# Supplementary material for: Tailoring the Random Lasing Properties by Controlled Phase Separation Process in PMMA:PVK Dye-Doped Polymeric Blends
Source: MDPI journal article supplement (doi:10.3390/polym13183182), 2021-09-19
Supplement: s1 [file s1]

## Supplement information

### **Tailoring the random lasing properties by controlled phase separation process in PMMA:PVK dye-doped polymeric blends**

Konrad Cyprych and Lech Sznitko\*

Advanced Materials Engineering and Modeling Group, Wrocław University of Science and Technology, Wybrzeże Wyspiańskiego 27, 50-370 Wrocław, Poland

\*Corresponding Author: [lech.sznitko@pwr.edu.pl](mailto:lech.sznitko@pwr.edu.pl)

**Keywords:** random laser, dye laser, polymeric blend, double-phase system, morphology, phase separation, waveguiding, quasi-waveguiding, PVK, PMMA, rhodamine 6G

**Schemes of samples preparation and experimental setup used for random lasing experiments:**

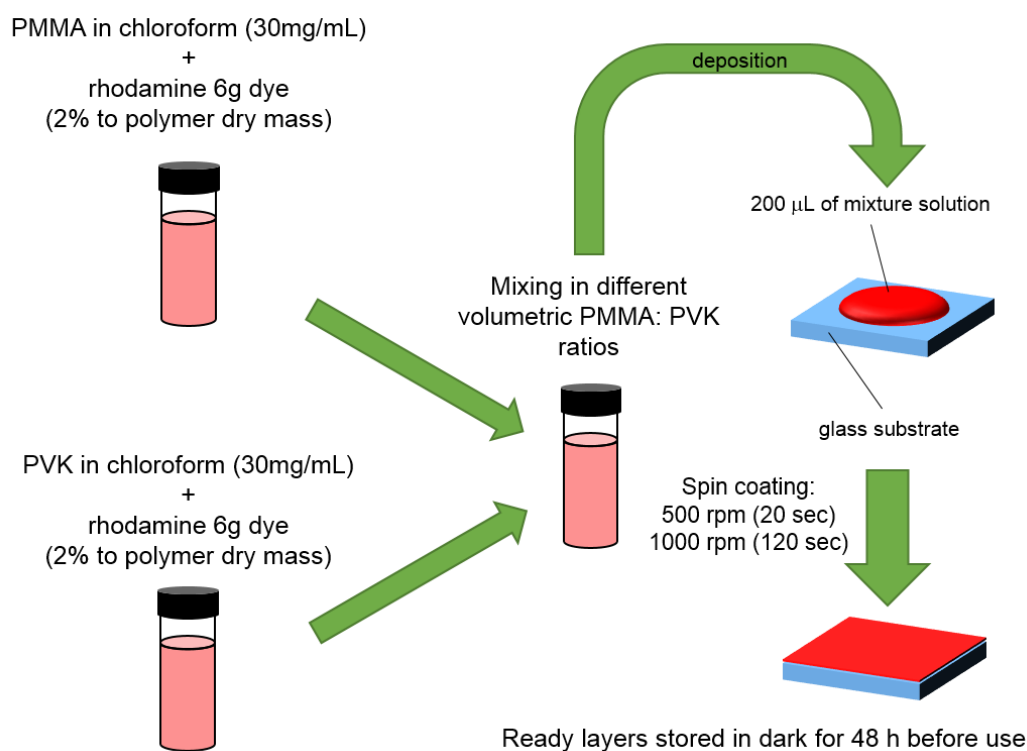

**Figure S1.** A scheme of the samples preparation procedure.

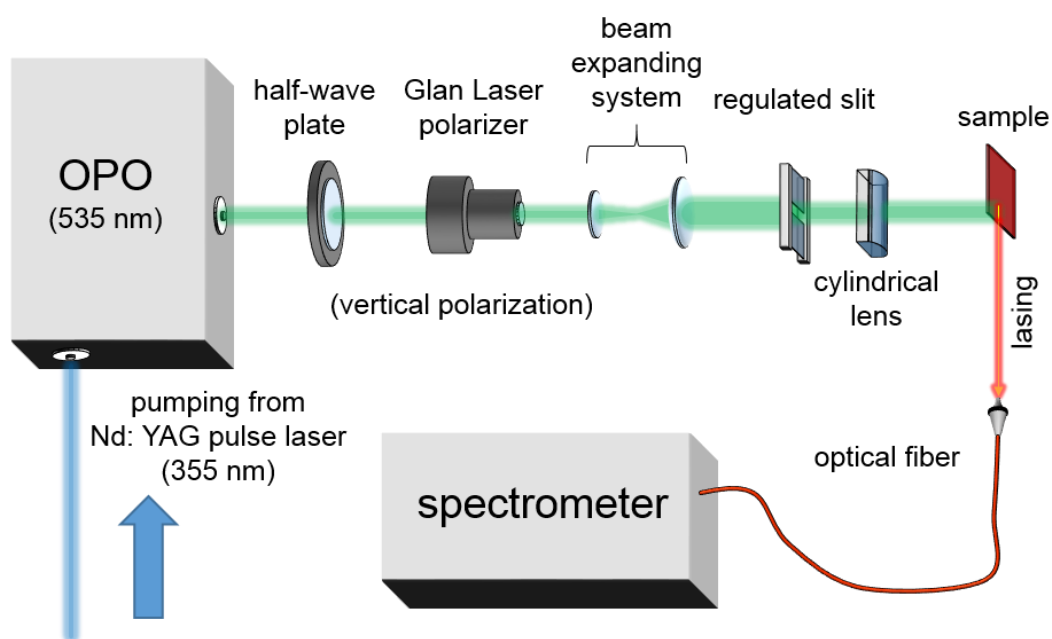

**Figure S2.** A scheme of the experimental setup used for random lasing experiments.

## AFM images and surface profiles:

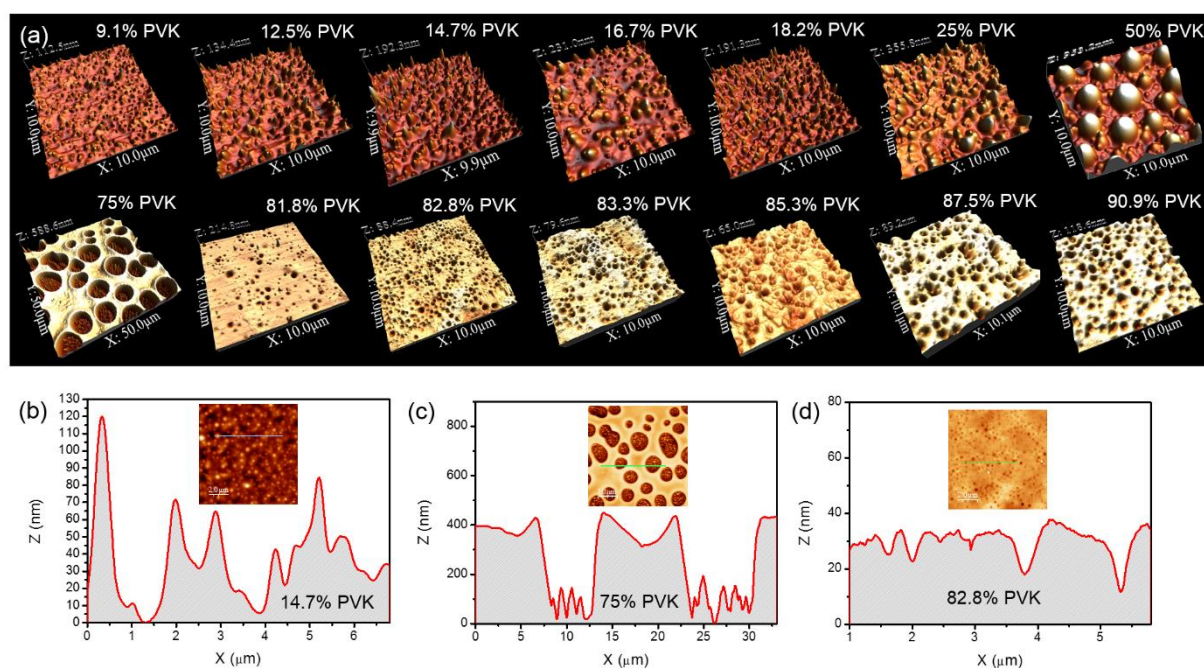

**Figure S3.** (a) 3D AFM images of PMMA:PVK blends with increasing PVK content. A comparison of exemplary surface profiles recorded for blends containing: (b) 14.7%; (c) 75%, and; (d) 82.8% of PVK.

## Height histograms:

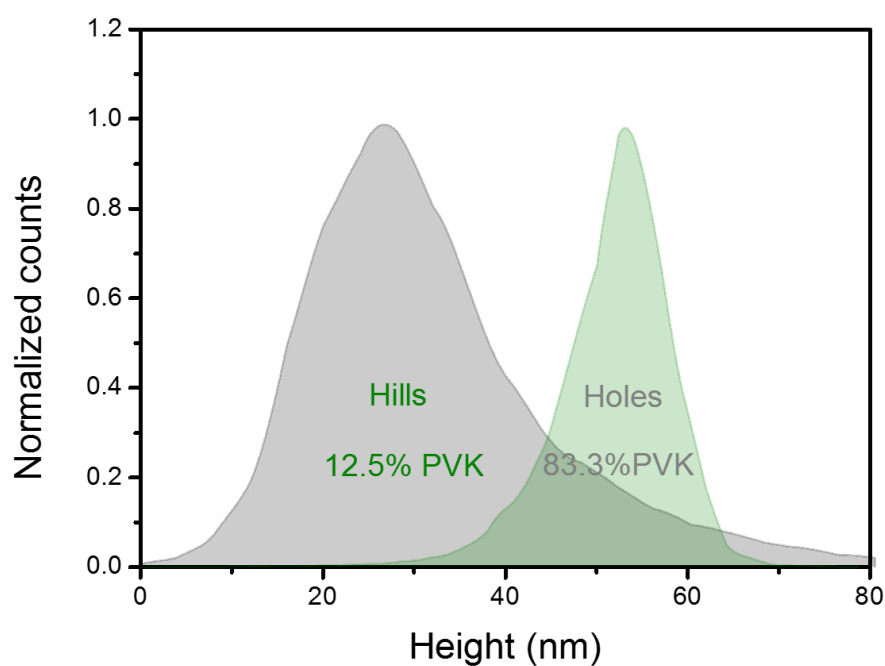

**Figure S4.** A comparison of height histograms shapes for samples dominated with hills (12.5% PVK) and holes (83.3% PVK).

## Flooding maps

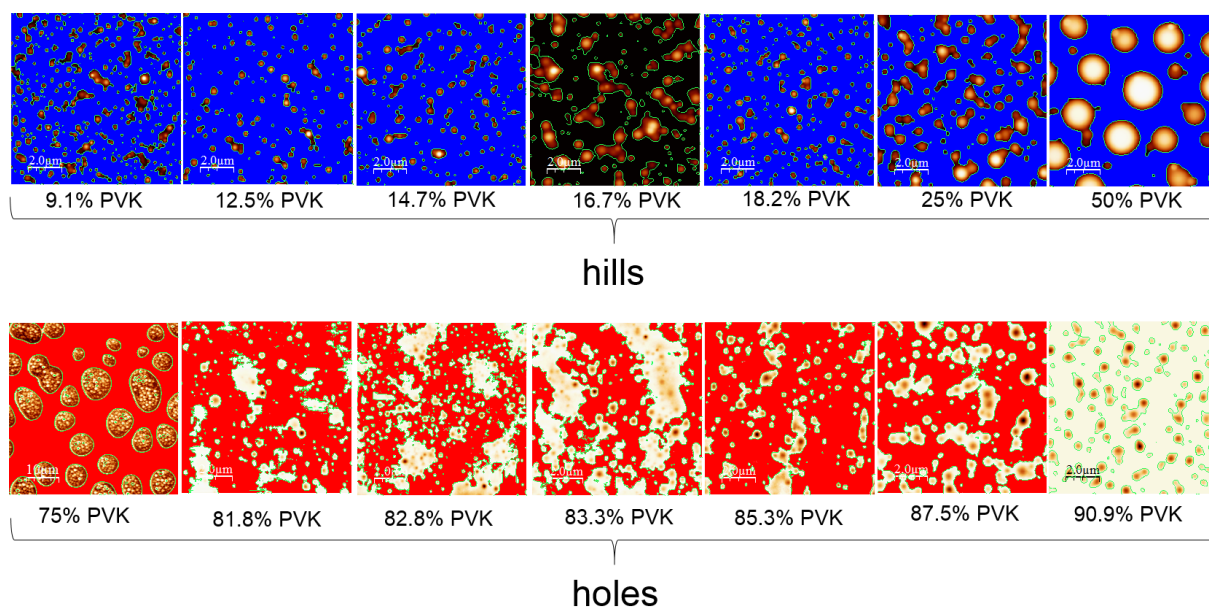

**Figure S5.** Flooding maps, used for the determination of NND parameters. The first row shows the position of hills, and the second row shows the position of holes.
